# Supplementary material for: A Z-type heterojunction of bimetal sulfide CuNi2S4 and CoWO4 for catalytic hydrogen evolution
Source: Royal Society of Chemistry journal article supplement (doi:10.1039/d0dt00854k), 2020-01-01
Supplement: d0dt00854k1.pdf [file d0dt00854k1.pdf]

# Supporting Information

## Catalytic hydrogen evolution performance of CoS<sub>x</sub> modified perovskite LaMnO<sub>3</sub> composites

Min Mao<sup>1</sup>, Jing Xu<sup>\*1,2,3,4</sup>, Ye Liu

*1 School of Chemistry and Chemical Engineering, North Minzu University, Yinchuan 750021, PR China.*

*2 Key Laboratory of Chemical Engineering and Technology (North Minzu University), State Ethnic Affairs Commission, Yinchuan 750021, PR China.*

*3 Ningxia Key Laboratory of Solar Chemical Conversion Technology Autonomous Region, North Minzu University, Yinchuan 750021, PR China.*

*Email: wgyxj2000@163.com*

### Band potential calculation

Pearson Absolute Electronegativity of different elements comes from the following database:

[http://www.knowledgedoor.com/2/elements\\_handbook/pearson\\_absolute\\_electronegativity.html#opennewwindow?tdsourcetag=s\\_pcqq\\_aiomsg](http://www.knowledgedoor.com/2/elements_handbook/pearson_absolute_electronegativity.html#opennewwindow?tdsourcetag=s_pcqq_aiomsg)

CoWO<sub>4</sub>:

$$\chi = [\chi(\text{Co}) * \chi(\text{W}) * \chi(\text{O})^4]^{1/6} = [\chi(4.30) * \chi(4.40) * \chi(7.54)^4]^{1/6} = 6.28 \text{ eV}$$

$$E_g = 2.68 \text{ eV}$$

$$E_{\text{CB}} = \chi - E^e - 0.5 E_g = 6.28 - 4.5 - 0.5 * 2.68 = 0.44 \text{ eV}$$

$$E_{\text{VB}} = E_{\text{CB}} + E_g = 3.12 \text{ eV}$$

CuNi<sub>2</sub>S<sub>4</sub>:

$$\chi = [\chi(\text{Cu}) * \chi(\text{Ni})^2 * \chi(\text{S})^4]^{1/7} = [\chi(4.48) * \chi(4.40)^2 * \chi(6.22)^4]^{1/7} = 5.38 \text{ eV}$$

$$E_g = 2.46 \text{ eV}$$

$$E_{CB} = \chi - E^c - 0.5 E_g = 5.38 - 4.5 - 0.5 * 2.46 = -0.35 \text{ eV}$$

$$E_{VB} = E_{CB} + E_g = 2.11 \text{ eV}$$
